# Supplementary material for: Changes in the partial pressure of carbon dioxide in the Mauritanian–Cap Vert upwelling region between 2005 and 2012
Source: Copernicus journal article supplement (doi:10.5194/bg-14-3859-2017), 2017-08-31
Supplement: Supplementary file 1 [file bg-14-3859-2017-supplement.pdf]

Supplement of Biogeosciences, 14, 3859–3871, 2017  
<https://doi.org/10.5194/bg-14-3859-2017-supplement>  
© Author(s) 2017. This work is distributed under  
the Creative Commons Attribution 3.0 License.

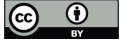

*Supplement of*

## **Changes in the partial pressure of carbon dioxide in the Mauritanian–Cap Vert upwelling region between 2005 and 2012**

**Melchor González-Dávila et al.**

*Correspondence to:* Melchor González-Dávila ([melchor.gonzalez@ulpgc.es](mailto:melchor.gonzalez@ulpgc.es))

The copyright of individual parts of the supplement might differ from the CC BY 3.0 License.

A figure with additional information have been referenced along the paper. Figure 1S presents the rainfall data collected by the Precipitation Radar installed on the Tropical Rainfall Measuring Mission (TRMM) satellite (<https://precip.gsfc.nasa.gov/>). Monthly averages with a spatial resolution of  $0.5^{\circ} \times 0.5^{\circ}$  (product 3A12, version 07) were used. Also, a list with the cruises used in this paper, with starting and ending date when the ship visited the area between  $27^{\circ}\text{N}$  and  $10^{\circ}\text{N}$ , and the color code for data presented in Fig. 4 and 5, is also included.

Supplementary Figure

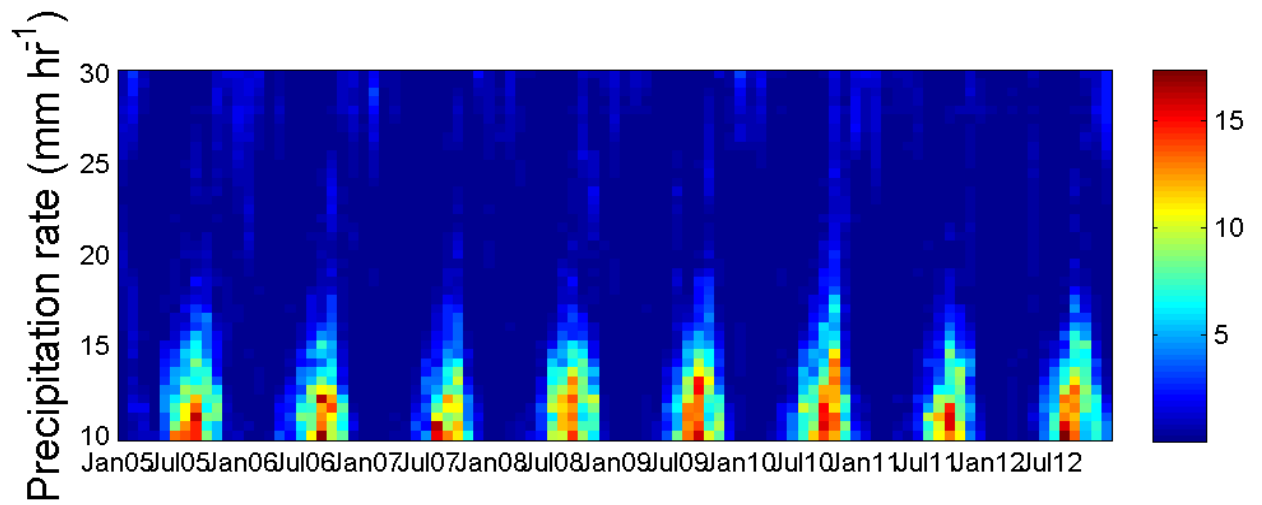

Figure S1. Time series of integrated precipitation (mm day<sup>-1</sup>) in the Mauritanian-Cape Verde upwelling region between 25.25°W and 9.75°W and between 10°N and 30°N (<https://precip.gsfc.nasa.gov>).

Table S1. Cruise names with starting and ending date when the ship visited the area between 27°N and 10°N along the QUIMA VOS line. The color code for Fig. 4 and 5 is also included.

| Cruise  | Starting Date<br>(yyyy-mm-dd) | Ending Date<br>(yyyy-mm-dd) | Colours in Fig. 4 and 5 |
|---------|-------------------------------|-----------------------------|-------------------------|
| 200508  | 2005-08-29                    | 2005-08-31                  | Blue                    |
| 200509  | 2005-09-16                    | 2005-09-17                  | Red                     |
| 200512  | 2005-12-26                    | 2005-12-29                  | Green                   |
| 200605  | 2006-05-21                    | 2006-05-23                  | Blue                    |
| 200606  | 2006-06-11                    | 2006-06-13                  | Red                     |
| 200608  | 2006-08-27                    | 2006-08-30                  | Magenta                 |
| 200610  | 2006-10-19                    | 2006-10-21                  | Brown                   |
| 200611  | 2006-11-19                    | 2006-11-21                  | Cyan                    |
| 200701  | 2007-01-08                    | 2007-01-10                  | Blue                    |
| 200703  | 2007-03-28                    | 2007-02-31                  | Magenta                 |
| 200706  | 2007-06-03                    | 2007-06-05                  | Cyan                    |
| 200707  | 2007-07-22                    | 2007-07-24                  | Brown                   |
| 200709  | 2007-09-07                    | 2007-09-09                  | Blue                    |
| 200711  | 2007-11-25                    | 2007-11-26                  | Brown                   |
| 200802  | 2008-02-01                    | 2008-02-29                  | Magenta                 |
| 200803  | 2008-03-25                    | 2008-03-25                  | Brown                   |
| 200805  | 2008-05-10                    | 2008-05-12                  | Red                     |
| 201012  | 2010-12-14                    | 2010-12-16                  | Blue                    |
| 201102  | 2011-02-15                    | 2011-02-18                  | Cyan                    |
| 201104  | 2011-04-06                    | 2011-04-09                  | Magenta                 |
| 201105  | 2011-05-25                    | 2011-05-26                  | Blue                    |
| 201107  | 2011-07-13                    | 2011-07-16                  | Brown                   |
| 201108  | 2011-08-13                    | 2011-08-16                  | Cyan                    |
| 201109  | 2011-08-31                    | 2011-09-03                  | Magenta                 |
| 201110  | 2011-10-03                    | 2011-10-05                  | Light Brown             |
| 201110b | 2011-10-19                    | 2011-10-22                  | Dark Brown              |
| 201111  | 2011-11-20                    | 2011-11-22                  | Red                     |
| 201112  | 2011-12-07                    | 2011-12-10                  | Magenta                 |
| 201201  | 2012-01-26                    | 2012-01-29                  | Dark Brown              |
| 201202  | 2012-02-28                    | 2012-03-01                  | Blue                    |
| 201203  | 2012-03-15                    | 2012-03-18                  | Red                     |
| 201204  | 2012-04-15                    | 2012-04-18                  | Green                   |
| 201205  | 2012-05-03                    | 2012-05-05                  | Light Brown             |
| 201208  | 2012-08-20                    | 2012-08-21                  | Blue                    |
| 201210  | 2012-10-15                    | 2012-10-18                  | Dark Brown              |
| 201211  | 2012-11-19                    | 2012-11-22                  | Blue                    |
| 201212  | 2012-12-10                    | 2012-12-13                  | Magenta                 |
